# Supplementary material for: High-temperature oxidation kinetics of nanostructured thermoelectric skutterudite CoSb3 under different environments
Source: Royal Society of Chemistry journal article supplement (doi:10.1039/d4ra08328h), 2024-01-01
Supplement: d4ra08328h1.pdf [file d4ra08328h1.pdf]

## Supplementary Information

### High-Temperature Oxidation Kinetics of Nanostructured Thermoelectric Skutterudite CoSb<sub>3</sub> Under Different Environments

*T. C. Anusree<sup>a</sup>, Anuj A. Vargeese<sup>a\*</sup>*

Laboratory for Energetic and Energy Materials Research, Department of Chemistry, National Institute of Technology Calicut, Calicut 673601 (India)

E-mail: aav@nitc.ac.in

#### 1. Kinetic computations

For kinetic computation, ICTAC recommendations were followed.<sup>1</sup> For the computation of kinetic parameters a nonlinear integral isoconversional method, Vyazovkin's method<sup>2</sup> was employed. The kinetics of the thermal analysis consider the rate to be a function of only two variables: temperature (T) and extent of conversion ( $\alpha$ ). This can be expressed as

$$\frac{d\alpha}{dt} = k(T)f(\alpha) \quad (1)$$

The temperature dependence of the rate is given by the Arrhenius equation, Eq (2), and accordingly Eq (1) can be modified to Eq (3)

$$k(T) = A \exp\left(\frac{-E}{RT}\right) \quad (2)$$

$$\frac{d\alpha}{dt} = A \exp\left(\frac{-E}{RT}\right) f(\alpha) \quad (3)$$

Where,  $k(T)$  is the rate constant,  $A$  is the pre-exponential factor,  $E$  is the activation energy, and  $R$  is the universal gas constant.

The isoconversional method assumes that, at a constant conversion rate, the rate is only a function of temperature. For non-isothermal heating conditions heating rate  $\beta$  is given by,

$$\beta = \frac{dT}{dt}$$

$$\frac{d\alpha}{dT} = \frac{A}{\beta} e^{-\left(\frac{E}{RT}\right) f(\alpha)} \quad (4)$$

Integration of equation (4)

$$g(\alpha) = \frac{A}{\beta} \int_0^T \exp\left(\frac{-E}{RT}\right) dT \quad (5)$$

This integration does not have any analytical solution. According to Vyazovkin's method for 'n' runs performed at different heating rates the  $E_\alpha$  values can be determined by minimizing the following equation,

$$\phi(E_\alpha) = \sum_{i=1}^n \sum_{j \neq i}^n \frac{I(E_\alpha, T_{\alpha,i}) \beta_i}{I(E_\alpha, T_{\alpha,j}) \beta_j} \quad (6)$$

Where the temperature integral (6) is solved numerically, using the third-degree approximation proposed by Senum and Yang<sup>3</sup>

$$I(E_\alpha, T_\alpha) = \int_0^{T_\alpha} \exp\left(\frac{-E_\alpha}{RT}\right) dT \quad (7)$$

## 2. Characterisation details

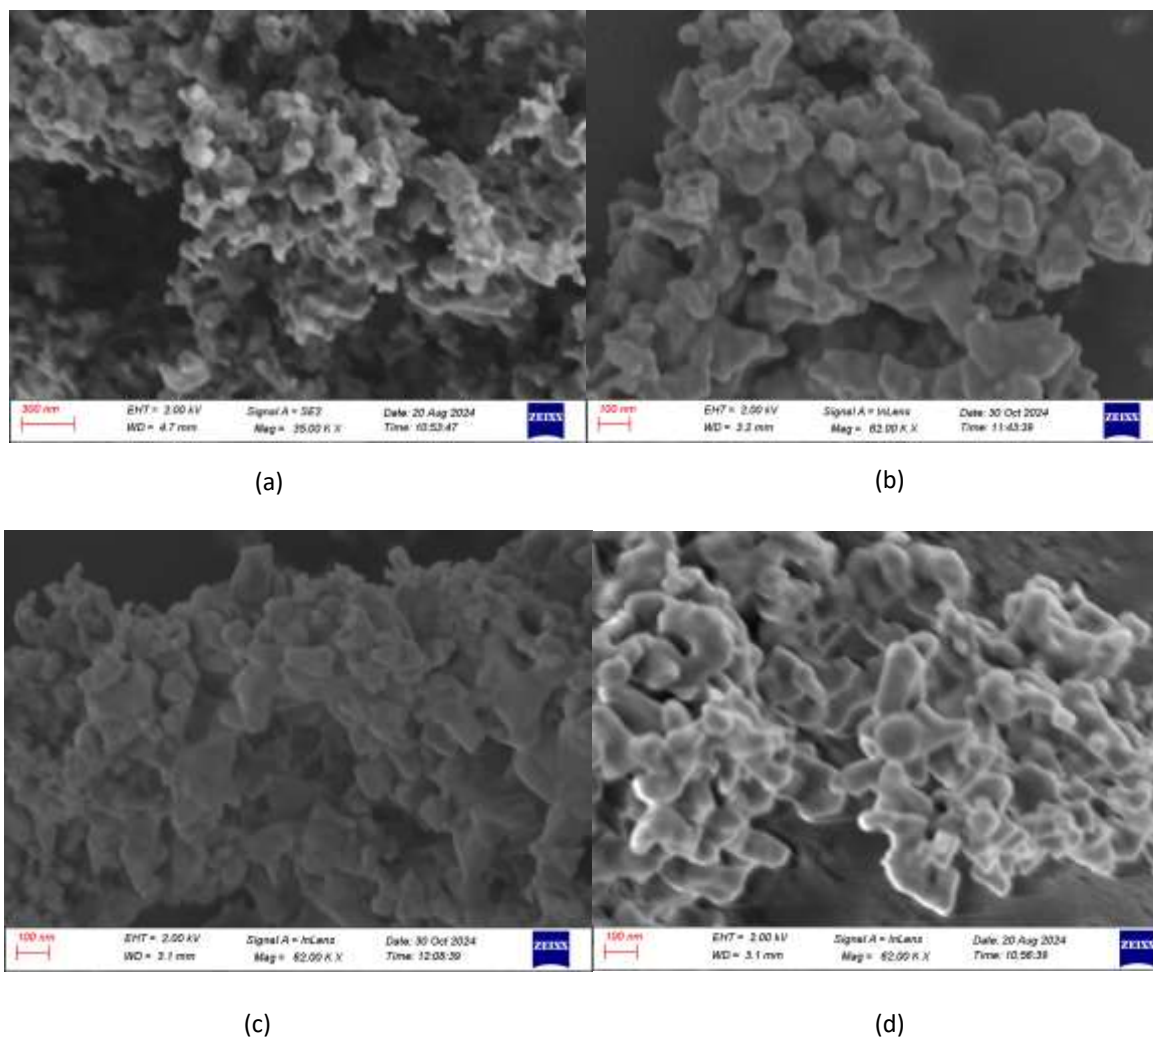

**Fig. S1** SEM images of CoSb<sub>3</sub> obtained (a) at optimized reaction conditions (1: 2.8 equivalents of reactants and reaction duration of 72 h) and SEM images showing morphology evolution from cassini oval to plate-like shape over the increment of the reaction duration from (b) 24 h to (c) 48 h and 72 h.

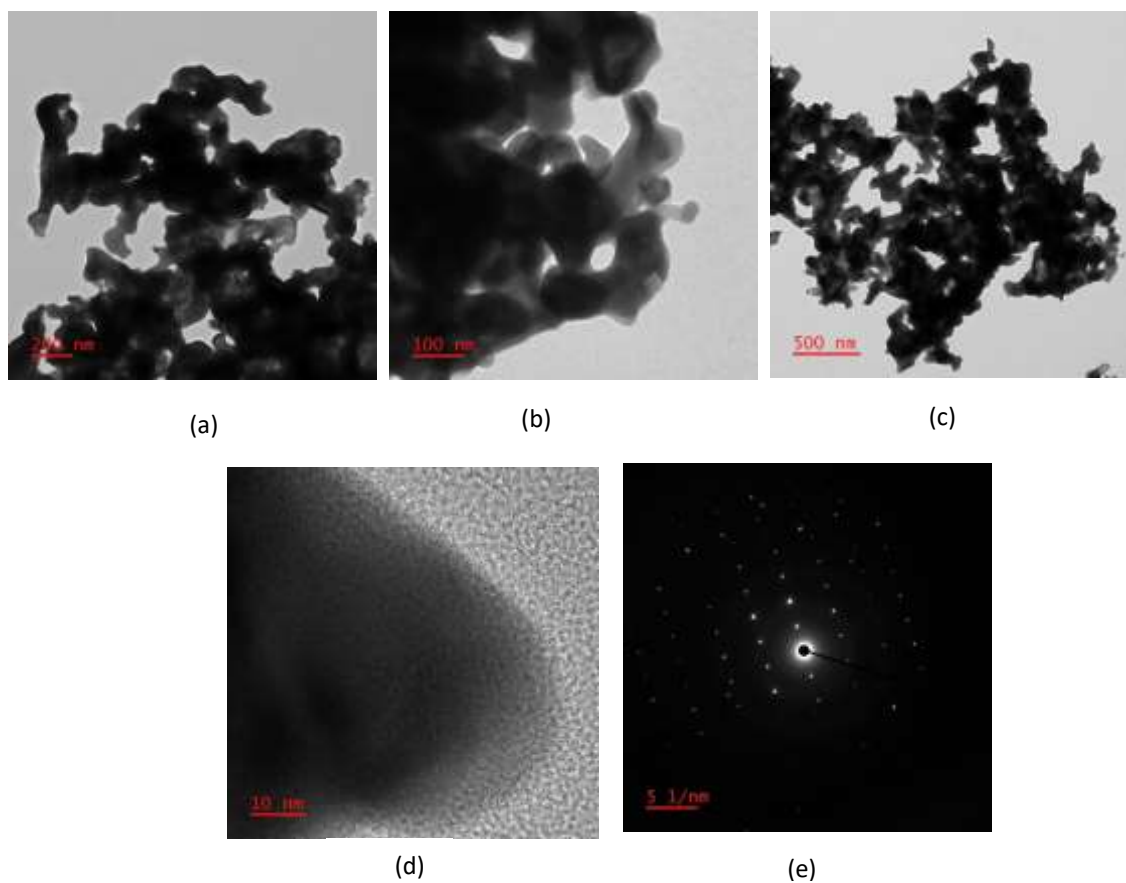

**Fig. S2** (a-c) TEM images of  $\text{CoSb}_3$  particles with different morphology (d) HRTEM image and (e) SAED pattern of  $\text{CoSb}_3$ .

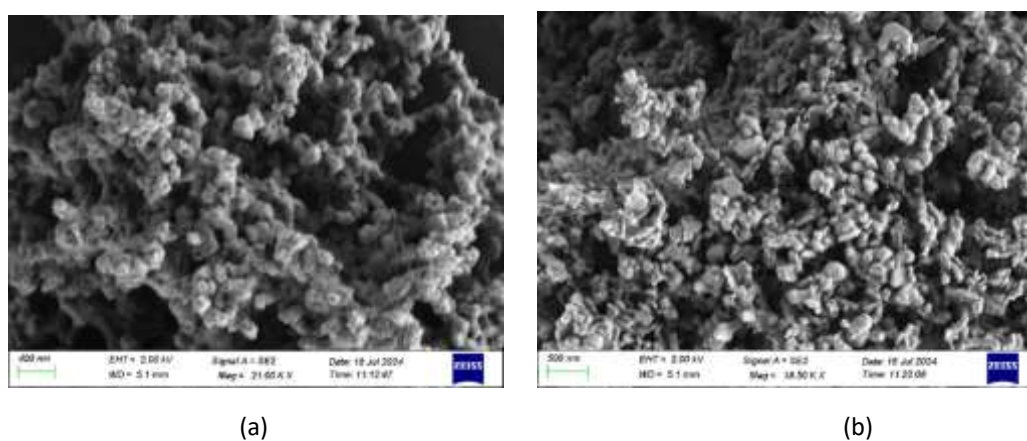

**Fig. S3** SEM images of TGA residue from room temperature to 700 °C in (a) air and (b)  $\text{N}_2$  atmosphere.

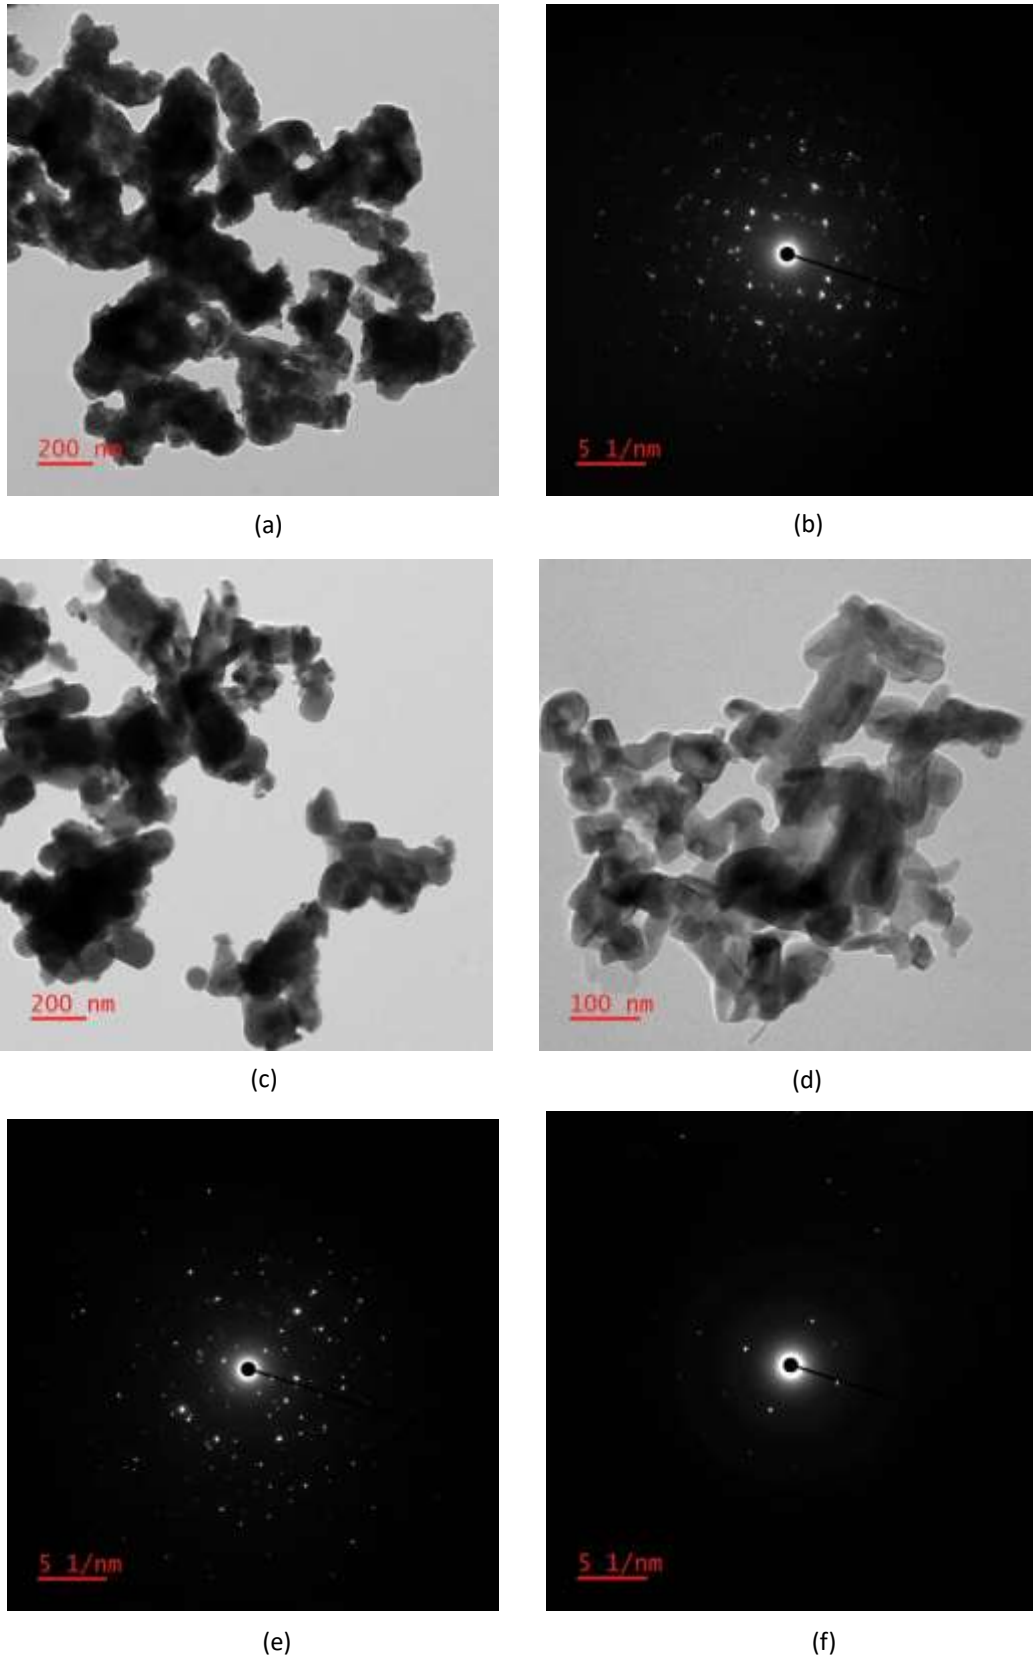

**Fig. S4** (a) TEM image and (b) SAED pattern of TGA residue from room temperature to 700 °C in the air (c-d) TEM images of the particles of different morphology and (e-f) SAED pattern of TGA residue from room temperature to 700 °C in N<sub>2</sub> atmosphere.

### 3. Thermal analysis data

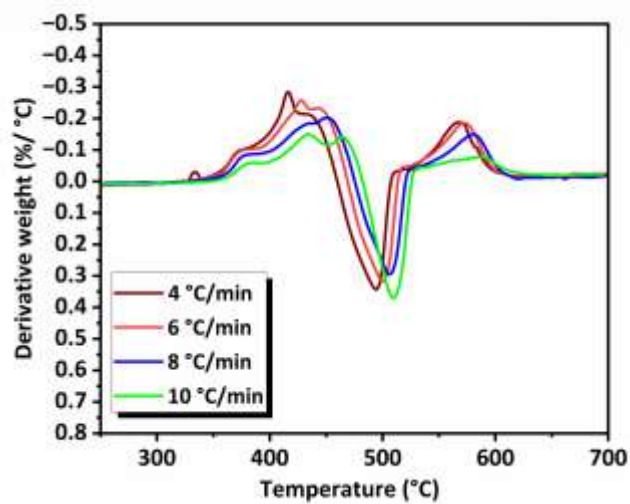

Fig. S5 DTG curves of CoSb<sub>3</sub> in air at different heating rates.

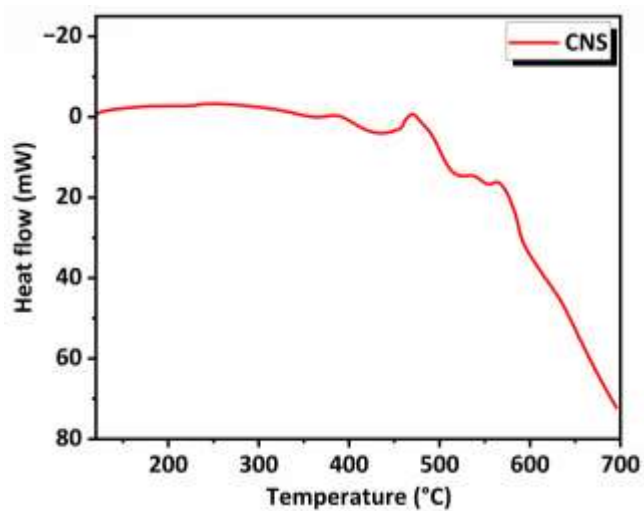

Fig. S6 DTA curve of CoSb<sub>3</sub> in N<sub>2</sub> atmosphere. (Performed using Perkin Elmer Simultaneous Thermal Analyser

(STA 6000)

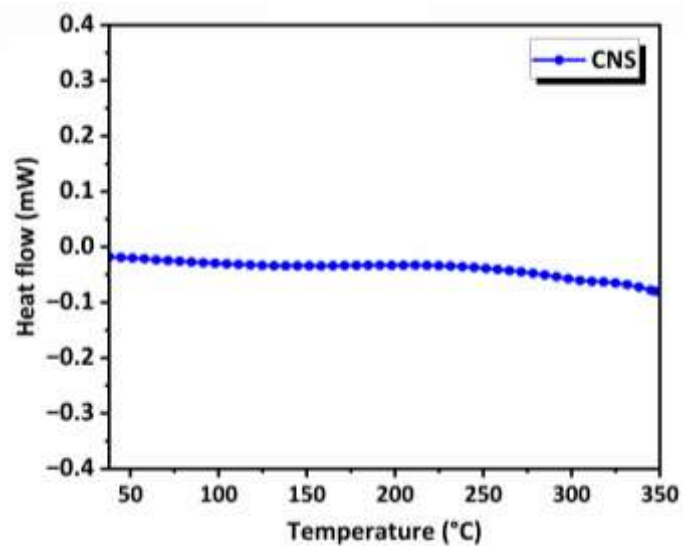

Fig. S6 DSC curve of CoSb<sub>3</sub> in N<sub>2</sub> atmosphere.

#### 4. Kinetic analysis data

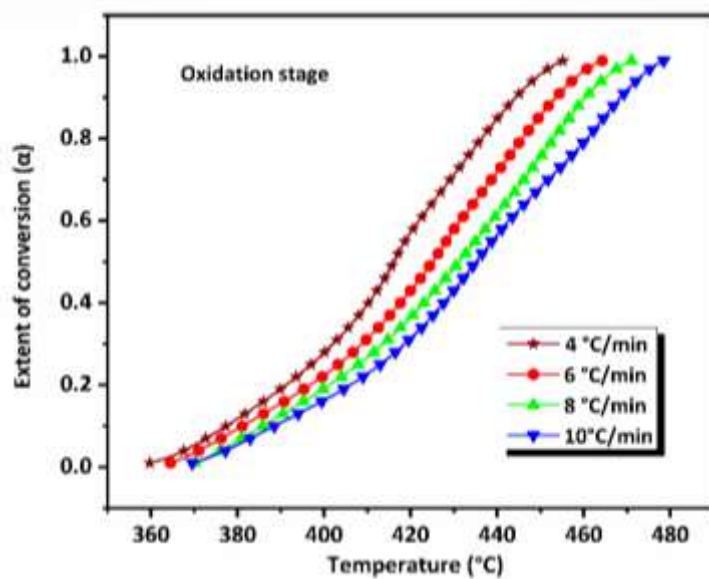

Fig. S7 Extent of conversion vs Temperature curve of oxidation stage.

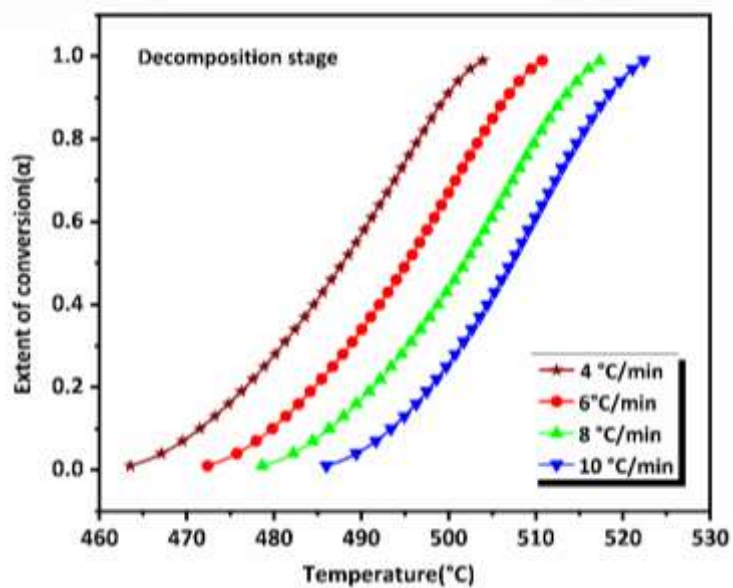

Fig. S8 Extent of conversion vs Temperature curve of decomposition stage.

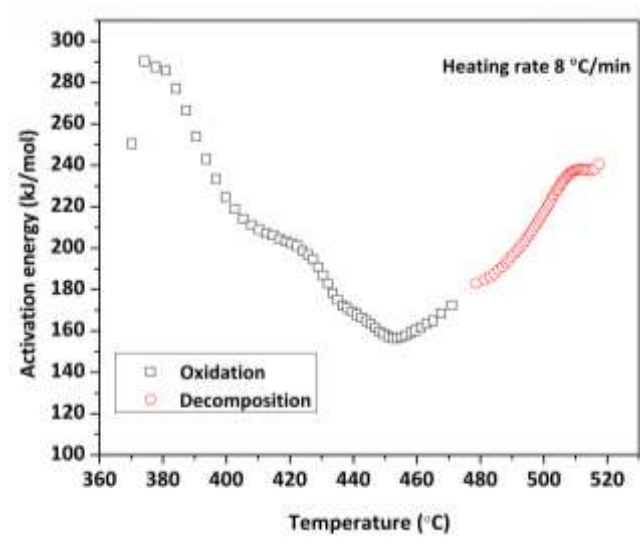

Fig. S9 Combined  $E_{\alpha}$  vs Temperature curve for oxidation and decomposition stages of  $\text{CoSb}_3$ .



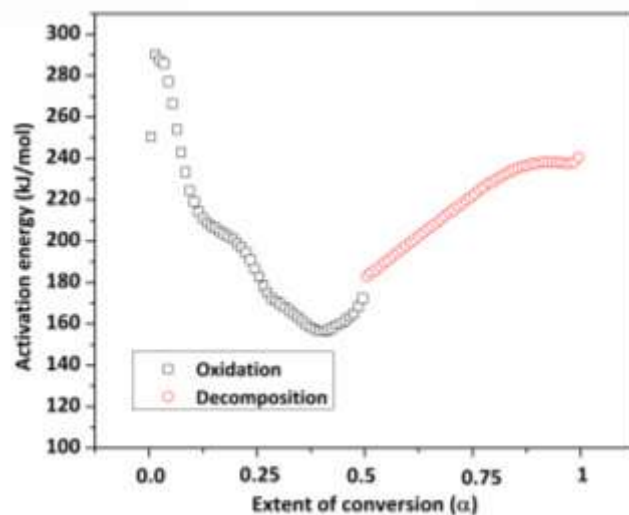

Fig. S10 Combined  $\alpha$  vs  $E_a$  curve for oxidation and decomposition stages of  $\text{CoSb}_3$ .

### 5. Degradation products of $\text{CoSb}_3$

| Sl. No | Compounds                                       | RT-700 °C |                | Up to maximum weight gain |                | Up to maximum weight loss |                |
|--------|-------------------------------------------------|-----------|----------------|---------------------------|----------------|---------------------------|----------------|
|        |                                                 | Air       | N <sub>2</sub> | Air                       | N <sub>2</sub> | Air                       | N <sub>2</sub> |
| 1      | $\text{CoSb}_2\text{O}_6$                       | ✓         | ✓              |                           | ✓              |                           | ✓              |
| 2      | $\text{Sb}_2\text{O}_5$                         | ✓         | ✓              | ✓                         | ✓              | ✓                         | ✓              |
| 3      | $\text{Sb}_2\text{O}_4$                         | ✓         | ✓              | ✓                         | ✓              | ✓                         | ✓              |
| 4      | $\text{Co}_3\text{O}_4$                         |           | ✓              | ✓                         | ✓              | ✓                         | ✓              |
| 6      | $(\text{Co}_7\text{Sb}_2\text{O}_{12})_{2.667}$ |           | ✓              | ✓                         |                |                           | ✓              |
| 7      | $\text{Sb}_2\text{O}_3$                         |           | ✓              | ✓                         | ✓              | ✓                         | ✓              |
| 9      | $\text{CoSb}_3$                                 |           |                | ✓                         |                |                           |                |
| 10     | $\text{Sb}_6\text{O}_{13}$                      |           |                |                           | ✓              |                           |                |
| 12     | $\text{CoSb}$                                   |           |                |                           | ✓              |                           | ✓              |
| 13     | $\text{Sb}_4\text{O}_6$                         |           |                |                           |                |                           | ✓              |

Table. S1 Details of the compounds observed in the PXRD pattern of TGA residues from different stages in air and

N<sub>2</sub> atmosphere

### References

- 1 S. Vyazovkin, A. K. Burnham, L. Favergeon, N. Koga, E. Moukhina, L. A. Pérez-Maqueda and N. Sbirrazzuoli, *Elsevier B.V.*, 2020, preprint, DOI: 10.1016/j.tca.2020.178597.
- 2 S. Vyazovkin and D. Dollimore, *Linear and Nonlinear Procedures in Isoconversional Computations of the Activation Energy of Nonisothermal Reactions in Solids*, 1996.
- 3 G. I. Senum and R. T. Yang, *J. Thermal Anal*, 1977, **11**, 445–447.
